# Supplementary material
Source: MDPI journal article supplement (https://www.mdpi.com/1999-4907/13/3/416)
Supplement: s1 [file s1 › forests-1586643-supplementary.pdf]

## Supplementary materials

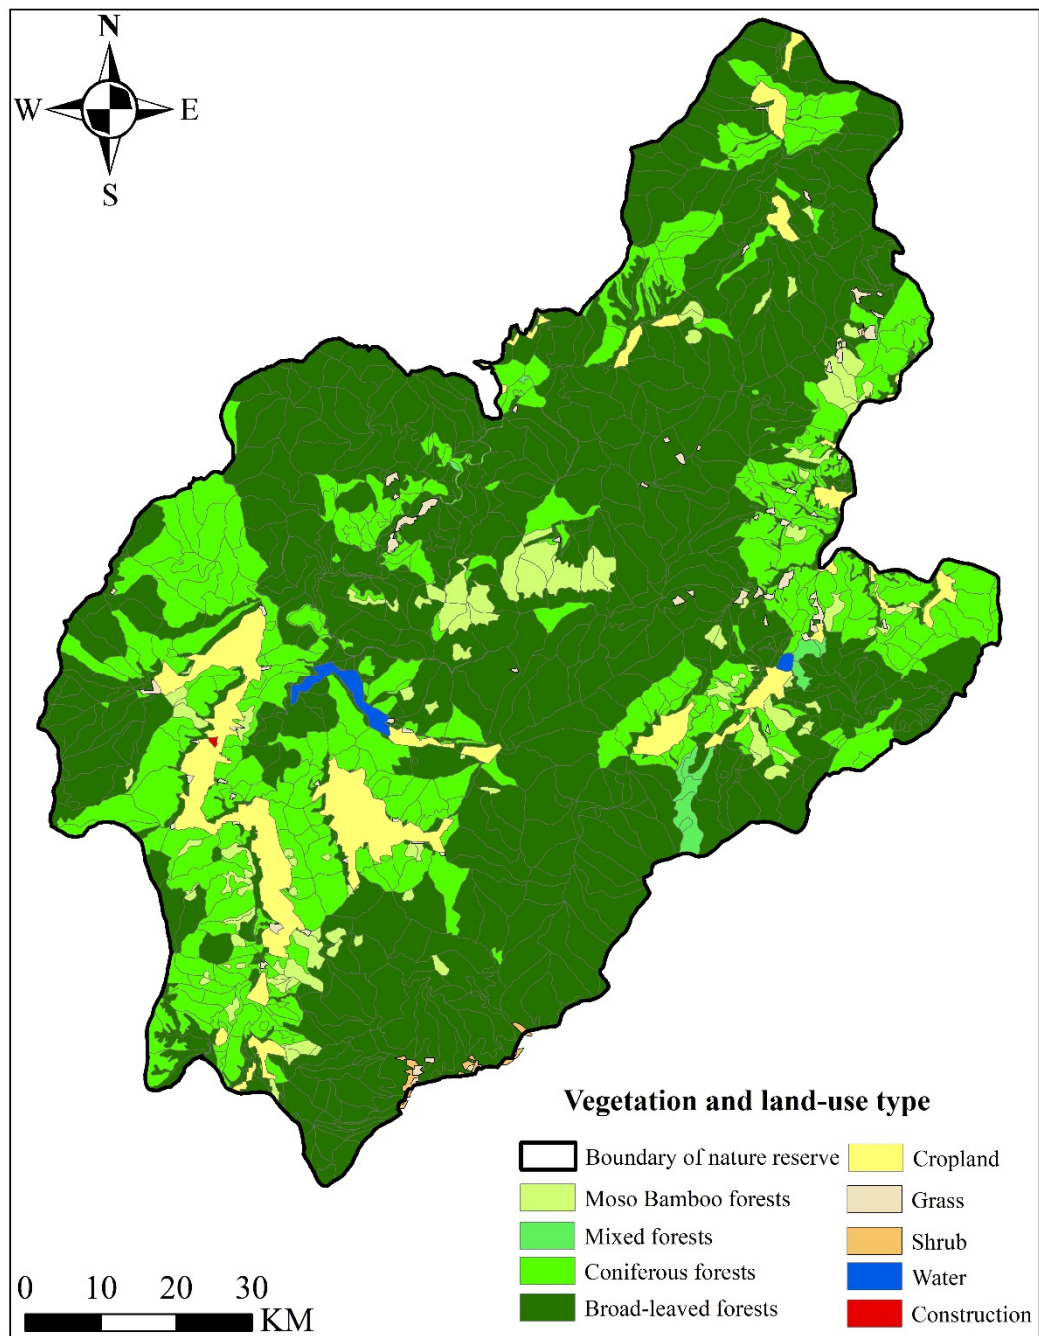

**Figure S1.** *The vegetation and land use/land cover types of the study area.*

**Table S1.** *Input data on carbon stored in each of the four fundamental pools for each LULC class in the InVEST 3.8.9 model*

| Unit: (t/ha)             |                     |                     |      |                     |
|--------------------------|---------------------|---------------------|------|---------------------|
| Land use/land cover type | Aboveground biomass | Belowground biomass | Soil | Dead organic matter |
| Cropland                 | 46                  | 3                   | 71   | 1                   |
| Forests                  | 218                 | 93                  | 115  | 43                  |
| Grass                    | 70.5                | 28                  | 47.5 | 1.5                 |
| Shrub                    | 90                  | 60                  | 110  | 30                  |
| Water                    | 10                  | 5                   | 20   | 0                   |
| Construction             | 0                   | 0                   | 50   | 0                   |

**Table S2.** *Input data for each LULC class in the InVEST 3.8.0 water yield model*

| Land use/land cover type | Evapotranspiration coefficient | Max root depth (mm) |
|--------------------------|--------------------------------|---------------------|
| Cropland                 | 0.6                            | 700                 |
| Forests                  | 0.613                          | 5000                |
| Grass                    | 0.591                          | 500                 |
| Shrub                    | 0.661                          | 2000                |
| Water                    | 1                              | 1                   |
| Construction             | 0.3                            | 1                   |

**Table S3.** *Input data for each LULC class in the InVEST 3.8.9 sediment delivery ratio model*

| Land use/land cover type | Cover and management factor | Management practice factor |
|--------------------------|-----------------------------|----------------------------|
| Cropland                 | 0.15                        | 1                          |
| Forests                  | 0.08                        | 0.2                        |
| Grass                    | 0.19                        | 0.7                        |
| Shrub                    | 0.09                        | 0.2                        |
| Water                    | 0                           | 0                          |
| Construction             | 0                           | 0                          |
